# Supplementary material for: Genome-Wide DNA Methylation in Early-Onset-Dementia Patients Brain Tissue and Lymphoblastoid Cell Lines
Source: MDPI journal article supplement (doi:10.3390/ijms25105445), 2024-05-16
Supplement: s1 [file s1]

**Additional file S2.**

a) Complete list of primers employed in the validation analysis.

| Gene          | Oligo Name   | Sequence                      |
|---------------|--------------|-------------------------------|
| <i>TUBAL3</i> | TUBAL3-F     | AGTAGTTGTGTTGGGTTTGAATA       |
|               | Bio-TUBAL3-R | TACTCCTTCCTTTTCTCTACCAATACTA  |
|               | TUBAL3-Seq   | GTGTTGGGTTTGAATAAT            |
| <i>ABCA1</i>  | ABCA1-F      | AGGTGGAGGTTGTAGTGA            |
|               | Bio-ABCA1-R  | CTCCCCTACAAATAAACATTTAAATC    |
|               | ABCA1-Seq    | TGTTTAGGGTTTATTATAGGT         |
| <i>SRPK2</i>  | SRPK2-F      | ATGGGAAGATTTATAGGTGATGAGAAAGA |
|               | Bio-SRPK2-R  | TTTCAATCCCTTCCCTCCAATTTT      |
|               | SRPK2-Seq    | ATGGGTTTTTAATTTTATAAAT        |

b) Results for pyrosequencing validation:

| Genes         | CpG        | Comparisons            | p value |
|---------------|------------|------------------------|---------|
| <i>TUBAL3</i> | cg10890644 | sFTD-TDP43 vs sFTD-Tau | 0.0079  |
| <i>ABCA1</i>  | cg02945674 | sEOAD vs CTRL          | 0.0204  |
|               |            | PSEN1 vs CTRL          |         |
|               |            | PSEN1 vs sEOAD         |         |

For each gene selected, the related CpG and significative comparison in which it was found are shown, as well as the p-value of the beta regression model performed. Abbreviations: CTRL, healthy controls; sEOAD, sporadic early-onset Alzheimer's disease; PSEN1, autosomal dominant Alzheimer's disease due to mutation in *PSEN1*; sFTD-Tau, sporadic frontotemporal dementia with accumulation of tau; sFTD-TDP43, sporadic frontotemporal dementia with accumulation of TDP43.
