# Supplementary material for: Genome-Wide DNA Methylation in Early-Onset-Dementia Patients Brain Tissue and Lymphoblastoid Cell Lines
Source: MDPI journal article supplement (doi:10.3390/ijms25105445), 2024-05-16
Supplement: s1 [file s1]

**Additional file S1.** List of all mutations included for each genetic group in both tissues.

| Brain             |             |              | LCLs         |             |              |
|-------------------|-------------|--------------|--------------|-------------|--------------|
| <i>GRN</i>        | <i>MAPT</i> | <i>PSEN1</i> | <i>GRN</i>   | <i>MAPT</i> | <i>PSEN1</i> |
| p.Q454AfsX54      | p.P301L     | p.L286P      | p.C366fsX1   | p.P301L     | p.L282R      |
| c.709-1G>A        | p.P301L     | p.M139T      | p.C366fsX1   | p.P301L     | p.I439S      |
| c.709-1G>A        | p.P301L     | p.P264L      | p.C366fsX1   | p.P397S     | p.G206D      |
| p.A303AfsX57      | p.P301L     | p.M139T      | p.Q257PfsX27 |             | p.L286P      |
| c.708+6_+9delTGAG | p.P301L     | p.M139T      | p.C366fsX1   |             | p.T116I      |
|                   |             |              |              |             | p.K239N      |

Abbreviations: GRN, MAPT, familial frontotemporal dementia caused by mutation in *GRN* or *MAPT*; PSEN1, autosomal dominant Alzheimer’s disease caused by mutation in *PSEN1*; LCLs, lymphoblastoid cell lines.
