# Supplementary material for: Genome-Wide DNA Methylation in Early-Onset-Dementia Patients Brain Tissue and Lymphoblastoid Cell Lines
Source: MDPI journal article supplement (doi:10.3390/ijms25105445), 2024-05-16
Supplement: s1 [file s1]

**Additional file S4.** Dementia causative genes and associated CpGs found in the methylation array.

| BRAIN        |            |                 |          |                               |                        |
|--------------|------------|-----------------|----------|-------------------------------|------------------------|
| Gene         | CpG        | Beta Difference | Adj.pval | Relation to nearest gene      | Relation to CpG Island |
| <i>PSEN1</i> | cg05385100 | 0.0483          | 0.0015   | 3'UTR                         | --                     |
|              | cg01640727 | 0.1318          | 0.0017   | 5'UTR                         | S_Shelf                |
|              | cg01934064 | 0.1533          | 0.0000   | Body                          | S_Shelf                |
|              | cg02159926 | 0.0885          | 0.0277   | 5'UTR                         | --                     |
|              | cg02228913 | 0.1383          | 0.0005   | Body                          | N_Shelf                |
|              | cg05396503 | 0.0596          | 0.0398   | Body                          | --                     |
|              | cg07368061 | 0.0954          | 0.0000   | Body                          | --                     |
|              | cg13773723 | -0.0083         | 0.0000   | TSS1500; 1stExon; Body; 5'UTR | Island                 |
|              | cg14431592 | 0.0920          | 0.0277   | TSS200; Body                  | --                     |
|              | cg14888901 | 0.0890          | 0.0048   | Body                          | --                     |
| <i>MAPT</i>  | cg15682851 | 0.0270          | 0.0013   | TSS200; Body                  | --                     |
|              | cg16520312 | 0.0360          | 0.0140   | TSS1500; Body                 | Island                 |
|              | cg18228076 | 0.1423          | 0.0005   | 5'UTR                         | --                     |
|              | cg18554795 | 0.0645          | 0.0011   | TSS1500; Body                 | --                     |
|              | cg19108736 | 0.1025          | 0.0065   | 5'UTR                         | S_Shelf                |
|              | cg20099416 | -0.0054         | 0.0172   | 1stExon; 5'UTR; Body; TSS1500 | Island                 |
|              | cg20265358 | 0.0735          | 0.0110   | Body                          | Island                 |
|              | cg20750326 | 0.0675          | 0.0071   | 5'UTR                         | --                     |
|              | cg21705961 | 0.0465          | 0.0274   | Body                          | S_Shore                |
|              | cg24677220 | 0.0403          | 0.0000   | Body; TSS1500                 | --                     |
| <i>GRN</i>   | cg24801230 | 0.2980          | 0.0000   | 5'UTR                         | S_Shelf                |
|              | cg07777378 | 0.0026          | 0.0150   | TSS200                        | --                     |
|              | cg21689086 | 0.0065          | 0.0170   | 1stExon; 5'UTR                | --                     |

|                           |            |         |        |                               |         |
|---------------------------|------------|---------|--------|-------------------------------|---------|
|                           | cg23322957 | 0.0773  | 0.0083 | 5'UTR                         | --      |
|                           | cg23570245 | 0.1123  | 0.0055 | 5'UTR                         | --      |
| <i>C9orf72</i>            | cg01589155 | 0.0333  | 0.0016 | 5'UTR; TSS200                 | S_Shore |
|                           | cg13958452 | 0.0574  | 0.0011 | 5'UTR                         | N_Shore |
| LYMPHOBLASTOID CELL LINES |            |         |        |                               |         |
|                           | cg06211357 | -0.0032 | 0.0026 | TSS200                        | Island  |
| <i>PSEN1</i>              | cg24216535 | 0.0536  | 0.0068 | Body                          | --      |
|                           | cg26376566 | -0.0065 | 0.0013 | 5'UTR                         | Island  |
| <i>MAPT</i>               | cg02159926 | -0.0192 | 0.0025 | 5'UTR                         | --      |
|                           | cg04601362 | 0.1520  | 0.0000 | 5'UTR                         | --      |
|                           | cg05533539 | -0.1570 | 0.0442 | 3'UTR                         | --      |
|                           | cg05721485 | 0.1209  | 0.0243 | Body                          | --      |
|                           | cg10780632 | -0.0224 | 0.0383 | 5'UTR; TSS1500; Body          | Island  |
|                           | cg11909912 | -0.0217 | 0.0043 | 5'UTR; Body                   | Island  |
|                           | cg13100502 | -0.0460 | 0.0192 | Body                          | --      |
|                           | cg13137533 | -0.0191 | 0.0176 | 5'UTR; TSS1500; Body          | Island  |
|                           | cg13773723 | -0.0132 | 0.0000 | TSS1500; 1stExon; Body; 5'UTR | Island  |
|                           | cg15617032 | 0.1814  | 0.0010 | 5'UTR                         | --      |
|                           | cg15739383 | 0.0925  | 0.0267 | 5'UTR                         | --      |
|                           | cg20265358 | 0.1376  | 0.0005 | Body                          | Island  |
|                           | cg23926235 | 0.0098  | 0.0101 | 5'UTR                         | N_Shelf |
|                           | cg25885883 | 0.1412  | 0.0048 | TSS1500; Body                 | --      |
|                           | cg17101358 | -0.0074 | 0.0079 | 5'UTR; 1stExon                | --      |
|                           | cg19107120 | -0.0499 | 0.0014 | 3'UTR                         | N_Shore |

For each of the CpGs found, the Beta difference, adjusted-p value and their relative positions are shown. Filters applied: adjusted-p value <0.05.
