# Supplementary material for: Genome-Wide DNA Methylation in Early-Onset-Dementia Patients Brain Tissue and Lymphoblastoid Cell Lines
Source: MDPI journal article supplement (doi:10.3390/ijms25105445), 2024-05-16
Supplement: s1 [file s1]

**Additional file S9.** Common differentially methylated CpGs (DMPs) found between FTD comparisons in brain.

| Genetic Patients vs. Control  |                                       |                   |          |                     |          |                  |          |
|-------------------------------|---------------------------------------|-------------------|----------|---------------------|----------|------------------|----------|
| CpG                           | Gene                                  | MAPT vs. CTRL     |          | GRN vs. CTRL        |          | C9orf72 vs. CTRL |          |
|                               |                                       | Beta difference   | Adj.pval | Beta difference     | Adj.pval | Beta difference  | Adj.pval |
| cg17925226                    | <i>BMPR1B</i>                         | 0.4267            | 0.0000   | 0.4659              | 0.0000   | 0.3109           | 0.0396   |
| cg15829774                    | <i>BTBD8</i>                          | 0.2624            | 0.0015   | 0.2631              | 0.0106   | 0.2514           | 0.0318   |
| cg15950547                    | <i>FAM107B</i>                        | 0.4573            | 0.0000   | 0.3335              | 0.0143   | 0.2913           | 0.0060   |
| cg07902519                    | <i>MYBPC1</i>                         | 0.3346            | 0.0108   | 0.3151              | 0.0164   | 0.3598           | 0.0048   |
| cg06354054                    | <i>DHX37</i>                          | 0.2989            | 0.0261   | 0.3303              | 0.0009   | 0.4019           | 0.0000   |
| cg14168080                    | <i>PTPRN2</i>                         | 0.3123            | 0.0380   | 0.4933              | 0.0000   | 0.2920           | 0.0263   |
| cg13521643                    | <i>GNG10;</i><br><i>DNAJC25-GNG10</i> | 0.3253            | 0.0335   | 0.3193              | 0.0172   | 0.3306           | 0.0352   |
| cg03958058                    | <i>PPP2R2D</i>                        | 0.5544            | 0.0005   | 0.6698              | 0.0000   | 0.5128           | 0.0092   |
| cg06174194                    | <i>PIK3CG</i>                         | 0.2929            | 0.0030   | 0.3870              | 0.0001   | 0.4376           | 0.0002   |
| cg15292356                    | <i>FOXK2</i>                          | 0.3618            | 0.0191   | 0.3600              | 0.0006   | 0.3705           | 0.0074   |
| cg00571519                    | <i>SRPK2</i>                          | 0.3204            | 0.0483   | 0.4430              | 0.0020   | 0.3718           | 0.0391   |
| cg17531142                    | <i>PVT1</i>                           | 0.2611            | 0.0073   | 0.2648              | 0.0026   | 0.2675           | 0.0080   |
| Sporadic Patients vs. Control |                                       |                   |          |                     |          |                  |          |
| CpG                           | Gene                                  | sFTD-Tau vs. CTRL |          | sFTD-TDP43 vs. CTRL |          | Beta difference  | Adj.pval |
|                               |                                       | Beta difference   | Adj.pval | Beta difference     | Adj.pval |                  |          |
| cg17925226                    | <i>BMPR1B</i>                         | 0.3718            | 0.0007   | 0.4702              | 0.0000   |                  |          |
| cg15829774                    | <i>BTBD8</i>                          | 0.2576            | 0.0039   | 0.2643              | 0.0023   |                  |          |
| cg07902519                    | <i>MYBPC1</i>                         | 0.2503            | 0.0048   | 0.3108              | 0.0025   |                  |          |
| cg00892228                    | <i>TAS1R2</i>                         | 0.4058            | 0.0271   | 0.3074              | 0.0452   |                  |          |
| cg20428144                    | <i>APOLD1</i>                         | 0.2882            | 0.0000   | 0.2755              | 0.0000   |                  |          |
| cg26178311                    | <i>DGCR14; TSSK2</i>                  | 0.2821            | 0.0202   | 0.2971              | 0.0219   |                  |          |
| cg15411736                    | <i>CLECL1</i>                         | 0.2723            | 0.0000   | 0.2688              | 0.0000   |                  |          |
| cg04242210                    | <i>DCLK1</i>                          | 0.2926            | 0.0013   | 0.2746              | 0.0029   |                  |          |
| cg19393008                    | <i>KRT82</i>                          | 0.2728            | 0.0379   | 0.2771              | 0.0075   |                  |          |
| cg27028557                    | <i>TPCN1</i>                          | 0.2533            | 0.0095   | 0.2686              | 0.0000   |                  |          |
| cg04103432                    | <i>COL3A1;</i><br><i>MIR1245A</i>     | 0.2574            | 0.0017   | 0.3027              | 0.0000   |                  |          |
| cg10737404                    | <i>USP13</i>                          | 0.3940            | 0.0000   | 0.3676              | 0.0000   |                  |          |
| cg15846907                    | <i>PRKCA</i>                          | 0.2678            | 0.0002   | 0.2808              | 0.0000   |                  |          |
| cg16645815                    | <i>INPP5A</i>                         | 0.2608            | 0.0396   | 0.2860              | 0.0234   |                  |          |
| cg11969330                    | <i>CYP4V2</i>                         | 0.4223            | 0.0000   | 0.3371              | 0.0001   |                  |          |
| cg01285783                    | <i>C6orf195</i>                       | 0.2961            | 0.0003   | 0.3076              | 0.0000   |                  |          |
| cg15516759                    | <i>APOL3</i>                          | 0.2687            | 0.0000   | 0.2741              | 0.0000   |                  |          |

|            |                  |         |        |         |        |
|------------|------------------|---------|--------|---------|--------|
| cg18405140 | <i>STK11</i>     | 0.2534  | 0.0255 | 0.2521  | 0.0000 |
| cg05928849 | <i>ASAM</i>      | 0.2567  | 0.0077 | 0.2697  | 0.0000 |
| cg17256465 | <i>FNDC3B</i>    | 0.2681  | 0.0458 | 0.2786  | 0.0181 |
| cg02535635 | <i>CLTC</i>      | 0.2904  | 0.0000 | 0.3111  | 0.0000 |
| cg22481673 | <i>RD3</i>       | 0.3324  | 0.0142 | 0.2661  | 0.0004 |
| cg13370086 | <i>TTC22</i>     | 0.2985  | 0.0189 | 0.3138  | 0.0044 |
| cg00729708 | <i>LASS3</i>     | 0.4374  | 0.0000 | 0.4625  | 0.0000 |
| cg18840580 | <i>ESPL1</i>     | 0.2852  | 0.0022 | 0.2715  | 0.0000 |
| cg13715467 | <i>GUCY1A2</i>   | 0.3563  | 0.0069 | 0.3214  | 0.0043 |
| cg12511848 | <i>GADD45B</i>   | 0.3146  | 0.0007 | 0.2522  | 0.0000 |
| cg14265677 | <i>LINC00944</i> | 0.2537  | 0.0444 | 0.2695  | 0.0128 |
| cg07505631 | <i>CDCP1</i>     | 0.5261  | 0.0028 | 0.3213  | 0.0098 |
| cg25017994 | <i>MOG</i>       | -0.3089 | 0.0371 | -0.2742 | 0.0000 |
| cg22053010 | <i>LINC00353</i> | 0.3662  | 0.0428 | 0.3381  | 0.0395 |
| cg08421632 | <i>ANLN</i>      | 0.3779  | 0.0030 | 0.3735  | 0.0020 |
| cg12515659 | <i>FAM134B</i>   | 0.3377  | 0.0216 | 0.3946  | 0.0075 |
| cg00571519 | <i>SRPK2</i>     | 0.3691  | 0.0198 | 0.3841  | 0.0030 |
| cg05834845 | <i>MUC4</i>      | 0.3019  | 0.0000 | 0.2574  | 0.0009 |
| cg23178186 | <i>TOLLIP</i>    | 0.2674  | 0.0048 | 0.2669  | 0.0000 |
| cg00853216 | <i>SOX6</i>      | 0.3536  | 0.0437 | 0.3507  | 0.0172 |
| cg16805094 | <i>THBS2</i>     | -0.2540 | 0.0235 | -0.2571 | 0.0000 |
| cg24996718 | <i>CLCA2</i>     | -0.3458 | 0.0000 | -0.3872 | 0.0001 |
| cg12852430 | <i>SOX6</i>      | 0.2682  | 0.0208 | 0.2825  | 0.0074 |
| cg18319872 | <i>ITSN1</i>     | 0.2838  | 0.0001 | 0.2914  | 0.0000 |
| cg04034998 | <i>ADAM12</i>    | 0.2584  | 0.0398 | 0.2910  | 0.0077 |

For each common DMPs found, their correspondent gene, methylation Beta difference and adjusted-p value is shown. Hyper or hypomethylation determined by the Beta difference refers to the patients' group. Filters applied: adjusted-p value <0.05 and absolute value of Beta difference >0.25. Abbreviations: CTRL, healthy controls; MAPT, GRN, C9orf72, familial frontotemporal dementia caused by mutation in MAPT, GRN or C9orf72; sFTD-Tau, sporadic frontotemporal dementia with tau deposits; sFTD-TDP43, sporadic frontotemporal dementia with TDP43 deposits.
