# Supplementary material for: Genome-Wide DNA Methylation in Early-Onset-Dementia Patients Brain Tissue and Lymphoblastoid Cell Lines
Source: MDPI journal article supplement (doi:10.3390/ijms25105445), 2024-05-16
Supplement: s1 [file s1]

### Additional file S11.

A) Equations for discriminating between the different compared groups using the combination of CpGs resulted from Elastic Net logistic regressions. The provided equations are for the linear predictor. To get the final probability, the following general formula has to be used:  $Prob(altered) = \frac{e^{LP}}{1+e^{LP}}$

| Comparisons         | Elastic Net results (Brain)                                                                                                                                                                                                                                                                                                                                                                                                                                                                                                                                                                                                                                                                                                                                                              |
|---------------------|------------------------------------------------------------------------------------------------------------------------------------------------------------------------------------------------------------------------------------------------------------------------------------------------------------------------------------------------------------------------------------------------------------------------------------------------------------------------------------------------------------------------------------------------------------------------------------------------------------------------------------------------------------------------------------------------------------------------------------------------------------------------------------------|
| sEOAD vs. CTRL      | -2.899 + 0.173*cg01059116 + 0.73*cg01371348 + 0.316*cg05451400 + 0.378*cg19921085 + 0.001*cg01823663 + 0.469*cg24766821 + 0.031*cg10360403 + 0.446*cg10881242 + -0.066*cg02458000 + 0.327*cg18912520 + 0.332*cg15390122 + 0.038*cg24084481 + -0.393*cg15684290 + 0.616*cg11809339 + 0.486*cg23968456 + 0.556*cg02467451 + 0.432*cg18748888                                                                                                                                                                                                                                                                                                                                                                                                                                               |
| PSEN1 vs. CTRL      | -0.631 + 0.005*cg04083553 + 0.121*cg07622001 + 0.063*cg26961808 + -0.032*cg11420142 + 0.227*cg07729393 + 0.094*cg23914904 + 0.343*cg16162172                                                                                                                                                                                                                                                                                                                                                                                                                                                                                                                                                                                                                                             |
| sFTD-Tau vs. CTRL   | -4.46 + 0.122*cg20987072 + 0.003*cg01048749 + 0.441*cg17600743 + -0.183*cg06264882 + 0.521*cg15066503 + 1.744*cg27335600 + 0.347*cg00597607 + 0.057*cg11969330 + 0.524*cg01302593 + 0.905*cg21010220 + 0.212*cg09715499 + 0.007*cg05017760 + 0.552*cg02780400 + 2.352*cg03602823 + 1.391*cg08288469 + 0.221*cg17217228 + 0*cg20889818 + -0.181*cg07884306 + 0.163*cg15784814 + 0.032*cg03476323                                                                                                                                                                                                                                                                                                                                                                                          |
| sFTD-TDP43 vs. CTRL | -3.261 + 0.006*cg27197651 + 0.375*cg04553810 + 1.538*cg05909164 + 0.374*cg16668359 + 0.159*cg16619576 + 0.007*cg13176012 + 0.224*cg19244790 + 0.626*cg16994200 + 0.044*cg02958670 + 0.055*cg12190504 + 0.148*cg01533585 + 0.011*cg12029281 + 0.001*cg23639368 + 0.081*cg01867538 + -0.132*cg06073220 + 4.548*cg18285951 + -0.164*cg10831642 + 0.844*cg26419957 + 0.589*cg03898385 + 0.253*cg16359034 + 0.166*cg04891961 + 0.345*cg27583483 + 0.217*cg18748888 + 0.26*cg09105928 + 0.136*cg04203646 + 0.347*cg25652610 + 0.14*cg03994651 + -0.093*cg24641125                                                                                                                                                                                                                              |
| MAPT vs. CTRL       | -1.594 + 0.016*cg16970559 + 0.024*cg26205842 + 0.02*cg03902905 + 0.066*cg02958670 + 0.23*cg09288273 + 0.015*cg06495631 + 0.019*cg01630199 + 0.034*cg22395253 + 0.855*cg06897306 + 0.363*cg14486338 + 0.001*cg11673283 + 0.002*cg24037820 + 0.011*cg04076403 + 0.527*cg03928367 + 0.061*cg11316868 + 0.024*cg02571448                                                                                                                                                                                                                                                                                                                                                                                                                                                                     |
| GRN vs. CTRL        | -5.918 + 0.026*cg08872579 + 0.335*cg06577951 + 0.02*cg06930255 + 0.014*cg04391718 + 0.069*cg02958670 + 0.013*cg10987720 + 0.017*cg16479474 + 0.787*cg16565902 + 2.981*cg16219283 + 0.141*cg14168080 + 0.068*cg01354455 + 0.406*cg19866040 + 0.009*cg10833066 + 0.153*cg17217228 + 0.125*cg14870958 + 1.084*cg05189517 + 0.283*cg09155905 + 0.001*cg27583483 + 0.39*cg12582138 + 7.375*cg25120928 + 0.491*cg15302968 + 2.379*cg26026416 + 0.145*cg17091610 + 0.167*cg17848838                                                                                                                                                                                                                                                                                                             |
| C9orf72 vs. CTRL    | -4.703 + 0.863*cg05617030 + 0.069*cg21577049 + 1.963*cg08551428 + 0.125*cg27288240 + 0.078*cg25654697 + 1.838*cg10072502 + -0.143*cg21211688 + 0.006*cg01354455 + 2.446*cg19219920 + 0.994*cg25161474 + 0.084*cg25045882 + 2.248*cg21009935 + 0.404*cg03588513 + 2.669*cg12177023 + 0.202*cg07821960 + 9.299*cg02792677 + 0.327*cg23504701                                                                                                                                                                                                                                                                                                                                                                                                                                               |
| Comparisons         | Elastic Net results (LCLs)                                                                                                                                                                                                                                                                                                                                                                                                                                                                                                                                                                                                                                                                                                                                                               |
| sEOAD vs. CTRL      | 15.633 + -0.008*cg01546084 + 12.258*cg04124260 + -0.144*cg24591105 + -0.022*cg14300132 + -0.068*cg03589296 + -1.682*cg16077818 + -0.119*cg14014369 + -1.358*cg13918646 + -0.046*cg10640830 + -1.724*cg04167833 + -0.497*cg15147693 + -0.027*cg20883227 + -0.003*cg01801101 + -0.511*cg10945855 + -0.403*cg10220850 + -0.317*cg10515852 + -5.04*cg10810860 + -0.173*cg14651896 + -0.146*cg20201177 + 8.625*cg07259717 + -2.776*cg00051979 + -0.346*cg16192621 + -0.165*cg02523018 + -0.885*cg17497052 + 0.321*cg11831988 + -1.125*cg10774305 + -0.038*cg27002522 + -0.001*cg04315470 + -0.153*cg10298855 + 0.027*cg15302765 + 6.849*cg09448951 + -0.373*cg23414361 + -1.846*cg03012230 + -0.371*cg02375258 + -0.016*cg01695406 + -0.814*cg08496404 + -4.892*cg15335837 + 0.033*cg20126498 |

|                |                                                                                                                                                                                                                                                                                                                                                                                                                                                                                                                                                                                                                                                                                                                                                                                                                                                                                                                                                                                                                                   |
|----------------|-----------------------------------------------------------------------------------------------------------------------------------------------------------------------------------------------------------------------------------------------------------------------------------------------------------------------------------------------------------------------------------------------------------------------------------------------------------------------------------------------------------------------------------------------------------------------------------------------------------------------------------------------------------------------------------------------------------------------------------------------------------------------------------------------------------------------------------------------------------------------------------------------------------------------------------------------------------------------------------------------------------------------------------|
| PSEN1 vs. CTRL | 0.271 + 0.609*cg04724058 + -0.066*cg09810149 + -0.305*cg09391823 + 0.565*cg04837898 + 5.216*cg02652511 + 2.768*cg22024370 + -0.005*cg24558204 + -0.013*cg11078654 + 1.072*cg05112824 + -0.422*cg01459283 + 0.022*cg21394561 + -0.082*cg12460598 + 0.167*cg13803003 + 4.314*cg03579738 + -0.194*cg12695921                                                                                                                                                                                                                                                                                                                                                                                                                                                                                                                                                                                                                                                                                                                         |
| MAPT vs. CTRL  | 0.695 + -0.025*cg21787209 + 0.012*cg03544800 + -0.012*cg10214933 + -0.129*cg00613416 + -0.009*cg21580594 + 0.029*cg25234732 + -0.015*cg02153747 + -0.009*cg26919731 + -0.036*cg22086536 + -0.05*cg01459283 + -0.007*cg25249386 + -0.01*cg02011185 + -0.028*cg07203494 + 0.276*cg12249207                                                                                                                                                                                                                                                                                                                                                                                                                                                                                                                                                                                                                                                                                                                                          |
| GRN vs. CTRL   | 8.307 + 0.061*cg18138172 + 0.216*cg04101267 + 5.291*cg02260687 + 0.032*cg06160440 + 2.457*cg09040434 + 0.046*cg02458039 + -2.626*cg01368406 + 0.849*cg24886176 + 0*cg21507332 + -0.34*cg11503661 + -0.436*cg02310273 + 0.272*cg25137613 + 0.921*cg18065337 + -0.483*cg23529139 + -3.556*cg06656551 + 17.223*cg15956008 + 0.551*cg04090147 + 2.516*cg14708076 + -0.16*cg04960128 + -0.355*cg16345566 + -0.713*cg03768479 + -0.536*cg00815484 + 0.185*cg08919780 + 3.406*cg09866690 + 0*cg02603686 + 2.277*cg03637614 + 2.357*cg21906414 + -0.651*cg14651896 + 0.294*cg01796367 + 0*cg10749860 + 0.002*cg18129327 + -0.363*cg16344810 + -0.293*cg14499074 + 0.002*cg13760807 + 0.005*cg00770636 + 2.374*cg20492200 + -0.995*cg03822098 + 0.492*cg23272632 + 0.838*cg07943633 + -0.357*cg01374787 + 2.598*cg07359369 + 0.271*cg17381632 + 0.002*cg17444839 + 0*cg27002699 + 0.954*cg16880783 + 7.337*cg22492273 + -1.383*cg13677144 + 6.038*cg16400971 + 0.971*cg03304299 + -0.882*cg18655348 + 1.457*cg19348733 + -0.248*cg11425737 |

Abbreviations: CTRL, healthy controls; sEOAD, sporadic early-onset Alzheimer's disease; PSEN1, autosomal dominant Alzheimer's disease caused by mutation in *PSEN1*; MAPT, GRN, C9orf72, familial frontotemporal dementia caused by mutation in *MAPT*, *GRN* or *C9orf72*; sFTD-Tau, sporadic frontotemporal dementia with tau deposits; sFTD-TDP43, sporadic frontotemporal dementia with TDP43 deposits; LCLs, lymphoblastoid cell lines; LP, linear predictor.

B) CpGs resulted from Elastic Net logistic regression (without equations)

| Comparisons         | Elastic Net results (Brain)                                                                                                                                                                                                                                                                                                                    |
|---------------------|------------------------------------------------------------------------------------------------------------------------------------------------------------------------------------------------------------------------------------------------------------------------------------------------------------------------------------------------|
| sEOAD vs. CTRL      | cg01059116; cg01371348; cg05451400; cg19921085; cg01823663; cg24766821; cg10360403; cg10881242; cg02458000; cg18912520; cg15390122; cg24084481; cg15684290; cg11809339; cg23968456; cg02467451; cg18748888                                                                                                                                     |
| PSEN1 vs. CTRL      | cg04083553; cg07622001; cg26961808; cg11420142; cg07729393; cg23914904; cg16162172                                                                                                                                                                                                                                                             |
| sFTD-Tau vs. CTRL   | cg00597607; cg01048749; cg01302593; cg02780400; cg03476323; cg03602823; cg05017760; cg06264882; cg07884306; cg08288469; cg09715499; cg11969330; cg15066503; cg15784814; cg17217228; cg17600743; cg20889818; cg20987072; cg21010220; cg27335600                                                                                                 |
| sFTD-TDP43 vs. CTRL | cg01533585; cg01867538; cg02958670; cg03898385; cg03994651; cg04203646; cg04553810; cg04891961; cg05909164; cg06073220; cg09105928; cg10831642; cg12029281; cg12190504; cg13176012; cg16359034; cg16619576; cg16668359; cg16994200; cg18285951; cg18748888; cg19244790; cg23639368; cg24641125; cg25652610; cg26419957; cg27197651; cg27583483 |

|                    |                                                                                                                                                                                                                                                                                                                                                                                                                                                                                                                                                                                                                                                |
|--------------------|------------------------------------------------------------------------------------------------------------------------------------------------------------------------------------------------------------------------------------------------------------------------------------------------------------------------------------------------------------------------------------------------------------------------------------------------------------------------------------------------------------------------------------------------------------------------------------------------------------------------------------------------|
| MAPT vs. CTRL      | cg01630199; cg02571448; cg02958670; cg03902905; cg03928367; cg04076403; cg06495631; cg06897306; cg09288273; cg11316868; cg11673283; cg14486338; cg16970559; cg22395253; cg24037820; cg26205842                                                                                                                                                                                                                                                                                                                                                                                                                                                 |
| GRN vs. CTRL       | cg01354455; cg02958670; cg04391718; cg05189517; cg06577951; cg06930255; cg08872579; cg09155905; cg10833066; cg10987720; cg12582138; cg14168080; cg14870958; cg15302968; cg16219283; cg16479474; cg16565902; cg17091610; cg17217228; cg17848838; cg19866040; cg25120928; cg26026416; cg27583483                                                                                                                                                                                                                                                                                                                                                 |
| C9orf72 vs. CTRL   | cg01354455; cg02792677; cg03588513; cg05617030; cg07821960; cg08551428; cg10072502; cg12177023; cg19219920; cg21009935; cg21211688; cg21577049; cg23504701; cg25045882; cg25161474; cg25654697; cg27288240                                                                                                                                                                                                                                                                                                                                                                                                                                     |
| <b>Comparisons</b> | <b>Elastic Net results (LCLs)</b>                                                                                                                                                                                                                                                                                                                                                                                                                                                                                                                                                                                                              |
| sEOAD vs. CTRL     | cg01546084; cg04124260; cg24591105; cg14300132; cg03589296; cg16077818; cg14014369; cg13918646; cg10640830; cg04167833; cg15147693; cg20883227; cg01801101; cg10945855; cg10220850; cg10515852; cg10810860; cg14651896; cg20201177; cg07259717; cg00051979; cg16192621; cg02523018; cg17497052; cg11831988; cg10774305; cg27002522; cg04315470; cg10298855; cg15302765; cg09448951; cg23414361; cg03012230; cg02375258; cg01695406; cg08496404; cg15335837; cg20126498                                                                                                                                                                         |
| PSEN1 vs. CTRL     | cg04724058; cg09810149; cg09391823; cg04837898; cg02652511; cg22024370; cg24558204; cg11078654; cg05112824; cg01459283; cg21394561; cg12460598; cg13803003; cg03579738; cg12695921                                                                                                                                                                                                                                                                                                                                                                                                                                                             |
| MAPT vs. CTRL      | cg00613416; cg01459283; cg02011185; cg02153747; cg03544800; cg07203494; cg10214933; cg12249207; cg21580594; cg21787209; cg22086536; cg25234732; cg25249386; cg26919731                                                                                                                                                                                                                                                                                                                                                                                                                                                                         |
| GRN vs. CTRL       | cg00770636; cg00815484; cg01368406; cg01374787; cg01796367; cg02260687; cg02310273; cg02458039; cg02603686; cg03304299; cg03637614; cg03768479; cg03822098; cg04090147; cg04101267; cg04960128; cg06160440; cg06656551; cg07359369; cg07943633; cg08919780; cg09040434; cg09866690; cg10749860; cg11425737; cg11503661; cg13677144; cg13760807; cg14499074; cg14651896; cg14708076; cg15956008; cg16344810; cg16345566; cg16400971; cg16880783; cg17381632; cg17444839; cg18065337; cg18129327; cg18138172; cg18655348; cg19348733; cg20492200; cg21507332; cg21906414; cg22492273; cg23272632; cg23529139; cg24886176; cg25137613; cg27002699 |

Abbreviations: CTRL, healthy controls; sEOAD, sporadic early-onset Alzheimer's disease; PSEN1, autosomal dominant Alzheimer's disease caused by mutation in *PSEN1*; MAPT, GRN, C9orf72, familial frontotemporal dementia caused by mutation in *MAPT*, *GRN* or *C9orf72*; sFTD-Tau, sporadic frontotemporal dementia with tau deposits; sFTD-TDP43, sporadic frontotemporal dementia with TDP43 deposits; LCLs, lymphoblastoid cell lines.
