# Supplementary material for: Genome-Wide DNA Methylation in Early-Onset-Dementia Patients Brain Tissue and Lymphoblastoid Cell Lines
Source: MDPI journal article supplement (doi:10.3390/ijms25105445), 2024-05-16
Supplement: s1 [file s1]

**Additional file S8.** Heatmaps with the top 10 differentially methylated positions (DMPs) in some FTD comparisons performed in brain samples.

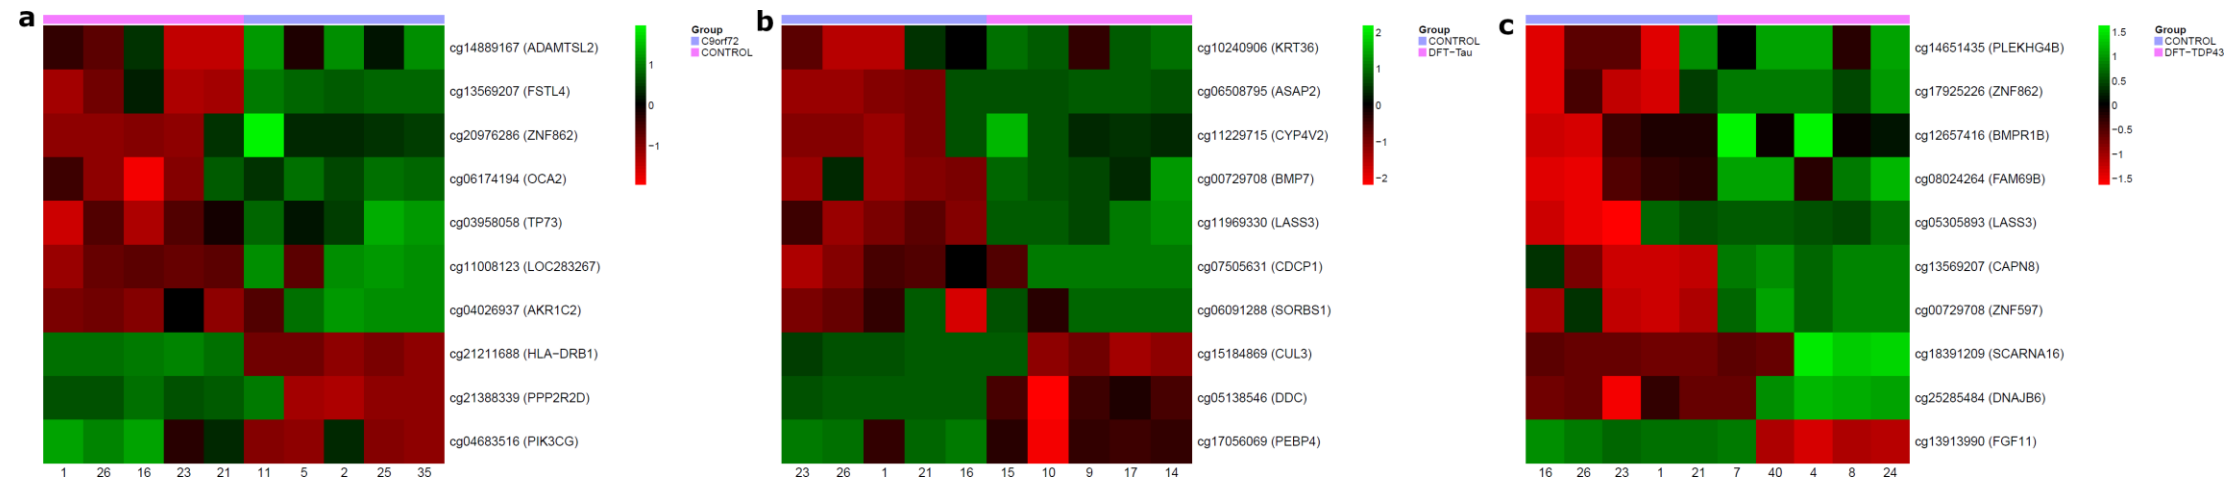

Each CpG obtained has the associated gene beside. **(a)** Brain C9orf72 vs. CTRL; **(b)** Brain sFTD-Tau vs. CTRL; **(c)** Brain sFTD-TDP43 vs. CTRL. Abbreviations: C9orf72, familial frontotemporal dementia caused by mutation in *C9orf72* gene; sFTD-Tau, sporadic frontotemporal dementia with tau deposits; sFTD-TDP43, sporadic frontotemporal dementia with TDP43 deposits; LCLs, lymphoblastoid cell lines.
