# Supplementary material for: Genome-Wide DNA Methylation in Early-Onset-Dementia Patients Brain Tissue and Lymphoblastoid Cell Lines
Source: MDPI journal article supplement (doi:10.3390/ijms25105445), 2024-05-16
Supplement: s1 [file s1]

**Additional file S7.** Pathways found in AD and FTD comparisons applying Reactome database.

| sEOAD vs. CTRL                      |       |               |                                                                                                          |         |                       |
|-------------------------------------|-------|---------------|----------------------------------------------------------------------------------------------------------|---------|-----------------------|
| BRAIN                               |       |               | LCLs                                                                                                     |         |                       |
| Biological process                  | FDR   | Root node     | Biological process                                                                                       | p-value | Root node             |
| Rhesus blood group biosynthesis     | 0.016 | Metabolism    | Transcriptional Regulation by MECP2                                                                      | 0.003   | Gene expression       |
| Cytokine Signaling in Immune system | 0.017 | Immune system | Activation of anterior HOX genes in hindbrain development during early embryogenesis                     | 0.006   | Developmental biology |
|                                     |       |               | Activation of HOX genes during differentiation                                                           | 0.006   | Developmental biology |
|                                     |       |               | Keratan sulfate degradation                                                                              | 0.008   | Metabolism            |
|                                     |       |               | Transport of gamma-carboxylated protein precursors from the endoplasmic reticulum to the Golgi apparatus | 0.012   | Metabolism            |
|                                     |       |               | CD28 dependent PI3K/Akt signaling                                                                        | 0.012   | Immune system         |
|                                     |       |               | Ras activation upon Ca2+ influx through NMDA receptor                                                    | 0.014   | Neuronal system       |
|                                     |       |               | Ca2+ activated K+ channels                                                                               | 0.015   | Neuronal system       |
|                                     |       |               | MECP2 regulates transcription factors                                                                    | 0.015   | Gene expression       |
|                                     |       |               | Removal of aminoterminal propeptides from gamma-carboxylated proteins                                    | 0.015   | Metabolism            |
|                                     |       |               | Unblocking of NMDA receptors, glutamate binding and activation                                           | 0.015   | Neuronal system       |
|                                     |       |               | Long-term potentiation                                                                                   | 0.020   | Neuronal system       |
|                                     |       |               | Apoptosis induced DNA fragmentation                                                                      | 0.024   | Programmed cell death |
|                                     |       |               | Synthesis of bile acids and bile salts via 27-hydroxycholesterol                                         | 0.025   | Metabolism            |
|                                     |       |               | PECAM1 interactions                                                                                      | 0.028   | Hemostasis            |
|                                     |       |               | Activation of the pre-replicative complex                                                                | 0.029   | DNA replication       |
|                                     |       |               | DNA replication initiation                                                                               | 0.035   | DNA replication       |

|  |                                                                                  |       |                 |
|--|----------------------------------------------------------------------------------|-------|-----------------|
|  | Gamma-carboxylation, transport, and amino-terminal cleavage of proteins          | 0.035 | Metabolism      |
|  | CD28 co-stimulation                                                              | 0.035 | Immune system   |
|  | CREB1 phosphorylation through NMDA receptor-mediated activation of RAS signaling | 0.035 | Neuronal system |
|  | Synthesis of IP3 and IP4 in the cytosol                                          | 0.035 | Metabolism      |
|  | SUMOylation of intracellular receptors                                           | 0.038 | Metabolism      |
|  | Reversible hydration of carbon dioxide                                           | 0.039 | Metabolism      |
|  | RUNX1 and FOXP3 control the development of regulatory T lymphocytes (Tregs)      | 0.039 | Gene expression |
|  | cGMP effects                                                                     | 0.043 | Hemostasis      |
|  | HS-GAG degradation                                                               | 0.048 | Metabolism      |
|  | Interleukin-2 signaling                                                          | 0.048 | Immune system   |

|                |  |  |  |  |  |
|----------------|--|--|--|--|--|
| PSEN1 vs. CTRL |  |  |  |  |  |
|----------------|--|--|--|--|--|

| BRAIN                                                                         |         |                       | LCLs                                                                              |         |                     |
|-------------------------------------------------------------------------------|---------|-----------------------|-----------------------------------------------------------------------------------|---------|---------------------|
| Biological process                                                            | p-value | Root node             | Biological process                                                                | p-value | Root node           |
| GRB7 events in ERBB2 signaling                                                | 0.003   | Signal transduction   | DARPP-32 events                                                                   | 0.003   | Signal transduction |
| FOXO-mediated transcription of oxidative stress, metabolic and neuronal genes | 0.003   | Gene expression       | Calcineurin activates NFAT                                                        | 0.006   | Immune system       |
| NR1H2 and NR1H3-mediated signaling                                            | 0.004   | Signal transduction   | NR1H2 & NR1H3 regulate gene expression linked to lipogenesis                      | 0.009   | Signal transduction |
| O-linked glycosylation                                                        | 0.006   | Metabolism            | CLEC7A (Dectin-1) induces NFAT activation                                         | 0.010   | Immune system       |
| RUNX3 Regulates Immune Response and Cell Migration                            | 0.007   | Gene expression       | MGMT-mediated DNA damage reversal                                                 | 0.017   | DNA repair          |
| Semaphorin interactions                                                       | 0.012   | Developmental biology | RORA activates gene expression                                                    | 0.019   | Circadian clock     |
| O-linked glycosylation of mucins                                              | 0.013   | Metabolism            | Defective TPMT causes Thiopurine S-methyltransferase deficiency (TPMT deficiency) | 0.025   | Disease             |

|                                                                                   |         |                       |                                                                                              |         |                                   |
|-----------------------------------------------------------------------------------|---------|-----------------------|----------------------------------------------------------------------------------------------|---------|-----------------------------------|
| LGI-ADAM interactions                                                             | 0.013   | Developmental biology | Defective SLC12A6 causes agenesis of the corpus callosum, with peripheral neuropathy (ACCPN) | 0.025   | Disease                           |
| Downregulation of ERBB2:ERBB3 signaling                                           | 0.017   | Signal transduction   | Growth hormone receptor signaling                                                            | 0.026   | Immune system                     |
| NR1H2 & NR1H3 regulate gene expression linked to lipogenesis                      | 0.019   | Signal transduction   | Activated NOTCH1 Transmits Signal to the Nucleus                                             | 0.031   | Signal transduction               |
| CRMPs in Sema3A signaling                                                         | 0.021   | Developmental biology | MECP2 regulates neuronal receptors and channels                                              | 0.031   | Gene expression                   |
| ERBB2 Activates PTK6 Signaling                                                    | 0.021   | Signal transduction   | Glycogen storage disease type 0 (muscle GYS1)                                                | 0.033   | Disease                           |
| ERBB2 Regulates Cell Motility                                                     | 0.023   | Signal transduction   | Glycogen storage disease type XV (GYG1)                                                      | 0.033   | Disease                           |
| Other semaphorin interactions                                                     | 0.023   | Developmental biology | Glycogen storage disease type II (GAA)                                                       | 0.033   | Disease                           |
| PI3K events in ERBB2 signaling                                                    | 0.030   | Signal transduction   | Interleukin-7 signaling                                                                      | 0.038   | Immune system                     |
| PI and PC transport between ER and Golgi membranes                                | 0.036   | Metabolism            | Integrin cell surface interactions                                                           | 0.039   | Extracellular matrix organization |
| Defective ALG1 causes ALG1-CDG (CDG-1k)                                           | 0.036   | Disease               | The NLRP1 inflammasome                                                                       | 0.042   | Immune system                     |
| EPH-Ephrin signaling                                                              | 0.036   | Developmental biology | GABA synthesis                                                                               | 0.050   | Neuronal system                   |
| NRAGE signals death through JNK                                                   | 0.043   | Signal transduction   | MECP2 regulates transcription of genes involved in GABA signaling                            | 0.050   | Gene expression                   |
| Termination of O-glycan biosynthesis                                              | 0.047   | Metabolism            |                                                                                              |         |                                   |
| Notch-HLH transcription pathway                                                   | 0.047   | Gene expression       |                                                                                              |         |                                   |
| FOXO-mediated transcription                                                       | 0.047   | Gene expression       |                                                                                              |         |                                   |
| NR1H3 & NR1H2 regulate gene expression linked to cholesterol transport and efflux | 0.048   | Signal transduction   |                                                                                              |         |                                   |
| PSEN1 vs. sEOAD                                                                   |         |                       |                                                                                              |         |                                   |
| BRAIN                                                                             |         |                       | LCLs                                                                                         |         |                                   |
| Biological process                                                                | p-value | Root node             | Biological process                                                                           | p-value | Root node                         |
| GABA synthesis, release, reuptake and degradation                                 | 0.001   | Neuronal system       | MECP2 regulates transcription factors                                                        | 0.008   | Gene expression                   |

|                                           |       |                                   |                                                                 |       |                                        |
|-------------------------------------------|-------|-----------------------------------|-----------------------------------------------------------------|-------|----------------------------------------|
| Neurotransmitter release cycle            | 0.002 | Neuronal system                   | Glutathione conjugation                                         | 0.013 | Metabolism                             |
| Transmission across Chemical Synapses     | 0.003 | Neuronal system                   | MGMT-mediated DNA damage reversal                               | 0.026 | DNA repair                             |
| CD28 dependent PI3K/Akt signaling         | 0.009 | Immune system                     | Aflatoxin activation and detoxification                         | 0.028 | Metabolism                             |
| Integrin cell surface interactions        | 0.012 | Extracellular matrix organization | Defective SLC6A3 causes Parkinsonism-dystonia infantile (PKDYS) | 0.039 | Disease                                |
| Laminin interactions                      | 0.012 | Extracellular matrix organization | Defective SLC6A3 causes Parkinsonism-dystonia infantile (PKDYS) | 0.039 | Disease                                |
| Pre-NOTCH Transcription and Translation   | 0.012 | Signal transduction               | Defective GGT1 causes Glutathionuria (GLUTH)                    | 0.039 | Disease                                |
| Glutamate Neurotransmitter Release Cycle  | 0.013 | Neuronal system                   | Defective SLC9A9 causes autism 16 (AUTS16)                      | 0.039 | Disease                                |
| Costimulation by the CD28 family          | 0.017 | Immune system                     | XAV939 stabilizes AXIN                                          | 0.039 | Disease                                |
| Neuronal System                           | 0.018 | //                                | Digestion of dietary lipid                                      | 0.041 | Digestion and absorption               |
| CD28 co-stimulation                       | 0.019 | Immune system                     | Synthesis of Ketone Bodies                                      | 0.041 | Metabolism                             |
| GPVI-mediated activation cascade          | 0.023 | Hemostasis                        | RORA activates gene expression                                  | 0.044 | Circadian clock                        |
| Pre-NOTCH Expression and Processing       | 0.023 | Signal transduction               | Negative regulation of MET activity                             | 0.044 | Signal transduction                    |
| VEGFR2 mediated vascular permeability     | 0.024 | Signal transduction               | Glutathione synthesis and recycling                             | 0.047 | Metabolism                             |
| Collagen chain trimerization              | 0.024 | Extracellular matrix organization | Amino acids regulate mTORC1                                     | 0.048 | Cellular response to external stimulus |
| MET interacts with TNS proteins           | 0.026 | Signal transduction               |                                                                 |       |                                        |
| Defective LFNG causes SCDO3               | 0.032 | Disease                           |                                                                 |       |                                        |
| Platelet Aggregation (Plug Formation)     | 0.033 | Hemostasis                        |                                                                 |       |                                        |
| VEGFA-VEGFR2 Pathway                      | 0.035 | Signal transduction               |                                                                 |       |                                        |
| Activation of AKT2                        | 0.037 | Signal transduction               |                                                                 |       |                                        |
| Toxicity of botulinum toxin type G (botG) | 0.037 | Disease                           |                                                                 |       |                                        |
| Pyruvate metabolism                       | 0.038 | Metabolism                        |                                                                 |       |                                        |
| Signaling by VEGF                         | 0.043 | Signal transduction               |                                                                 |       |                                        |
| Interferon gamma signaling                | 0.049 | Immune system                     |                                                                 |       |                                        |

| sFTD-Tau vs. CTRL                                  |         |                              | sFTD-TDP43 vs. CTRL                                                          |         |                                   |
|----------------------------------------------------|---------|------------------------------|------------------------------------------------------------------------------|---------|-----------------------------------|
| Biological process                                 | p-value | Root node                    | Biological process                                                           | FDR     | Root node                         |
| RUNX3 regulates YAP1-mediated transcription        | 0.001   | Gene expression              | Downstream TCR signaling                                                     | 0.000   | Immune system                     |
| SHC1 events in ERBB4 signaling                     | 0.001   | Signal transduction          | TCR signaling                                                                | 0.000   | Immune system                     |
| GRB2 events in ERBB2 signaling                     | 0.001   | Signal transduction          | sFTD-TDP43 vs. sFTD-Tau                                                      |         |                                   |
| SHC1 events in ERBB2 signaling                     | 0.001   | Signal transduction          | Biological process                                                           | p-value | Root node                         |
| Binding of TCF/LEF:CTNNB1 to target gene promoters | 0.002   | Signal transduction          | Diseases of hemostasis                                                       | 0.004   | Disease                           |
| Downregulation of ERBB4 signaling                  | 0.002   | Signal transduction          | Defects of contact activation system (CAS) and kallikrein/kinin system (KKS) | 0.004   | Disease                           |
| ROBO receptors bind AKAP5                          | 0.002   | Developmental biology        | Crosslinking of collagen fibrils                                             | 0.005   | Extracellular matrix organization |
| Nitric oxide stimulates guanylate cyclase          | 0.003   | Hemostasis                   | Post-chaperonin tubulin folding pathway                                      | 0.005   | Metabolism                        |
| Nuclear signaling by ERBB4                         | 0.005   | Signal transduction          | Intrinsic Pathway of Fibrin Clot Formation                                   | 0.009   | Hemostasis                        |
| PI3K events in ERBB4 signaling                     | 0.005   | Signal transduction          | Defective SERPING1 causes hereditary angioedema                              | 0.013   | Disease                           |
| Signaling by Receptor Tyrosine Kinases             | 0.005   | Signal transduction          | Extracellular matrix organization                                            | 0.013   | Extracellular matrix organization |
| DAG and IP3 signaling                              | 0.008   | Signal transduction          | Elastic fibre formation                                                      | 0.016   | Extracellular matrix organization |
| Phosphate bond hydrolysis by NUDT proteins         | 0.008   | Metabolism                   | Defective factor XII causes hereditary angioedema                            | 0.017   | Disease                           |
| HDL assembly                                       | 0.008   | Transport of small molecules | RHOBTB1 GTPase cycle                                                         | 0.021   | Signal transduction               |
| GRB7 events in ERBB2 signaling                     | 0.008   | Signal transduction          | NGF processing                                                               | 0.021   | Signal transduction               |
| Signaling by ERBB2 TMD/JMD mutants                 | 0.009   | Disease                      | Expression and Processing of Neurotrophins                                   | 0.021   | Signal transduction               |
| Signaling by ERBB2                                 | 0.009   | Signal transduction          | Degradation of the extracellular matrix                                      | 0.025   | Extracellular matrix organization |
| Downregulation of ERBB2 signaling                  | 0.010   | Signal transduction          | RHOBTB2 GTPase cycle                                                         | 0.025   | Signal transduction               |

|  |                                                              |       |                                   |
|--|--------------------------------------------------------------|-------|-----------------------------------|
|  | Formation of Fibrin Clot (Clotting Cascade)                  | 0.028 | Hemostasis                        |
|  | Defective F9 activation                                      | 0.029 | Disease                           |
|  | COPI-independent Golgi-to-ER retrograde traffic              | 0.029 | Vesicle-mediated transport        |
|  | Assembly of collagen fibrils and other multimeric structures | 0.033 | Extracellular matrix organization |
|  | Nef and signal transduction                                  | 0.037 | Disease                           |
|  | Diseases associated with O-glycosylation of proteins         | 0.043 | Disease                           |

| MAPT vs. CTRL                                     |         |                     |                                               |         |                 |
|---------------------------------------------------|---------|---------------------|-----------------------------------------------|---------|-----------------|
| BRAIN                                             |         |                     | LCLs                                          |         |                 |
| Biological process                                | p-value | Root node           | Biological process                            | FDR     | Root node       |
| RUNX3 regulates CDKN1A transcription              | 0.002   | Gene expression     | Nuclear Receptor transcription pathway        | 0.000   | Gene expression |
| Opioid Signaling                                  | 0.007   | Signal transduction |                                               |         |                 |
| O-glycosylation of TSR domain-containing proteins | 0.008   | Metabolism          |                                               |         |                 |
| FOXO-mediated transcription of cell cycle genes   | 0.009   | Gene expression     |                                               |         |                 |
| GRN vs. CTRL                                      |         |                     |                                               |         |                 |
| BRAIN                                             |         |                     | LCLs                                          |         |                 |
| Biological process                                | FDR     | Root node           | Biological process                            | p-value | Root node       |
| Interferon gamma signaling                        | 0.000   | Immune system       | MECP2 regulates transcription factors         | 0.003   | Gene expression |
|                                                   |         |                     | Adaptive Immune System                        | 0.008   | Immune system   |
|                                                   |         |                     | Defective F8 binding to von Willebrand factor | 0.015   | Disease         |
|                                                   |         |                     | Vitamin C (ascorbate) metabolism              | 0.017   | Metabolism      |
|                                                   |         |                     | Growth hormone receptor signaling             | 0.021   | Immune system   |

|                              |            |                                   |                                        |       |               |
|------------------------------|------------|-----------------------------------|----------------------------------------|-------|---------------|
|                              |            |                                   | MPS IV - Morquio syndrome A            | 0.022 | Disease       |
|                              |            |                                   | Glycogen storage disease type II (GAA) | 0.030 | Disease       |
| <b>C9orf72 vs. CTRL</b>      |            |                                   | Defective F8 cleavage by thrombin      | 0.030 | Disease       |
| <b>Biological process</b>    | <b>FDR</b> | <b>Root node</b>                  | Interleukin-7 signaling                | 0.031 | Immune system |
| Collagen chain trimerization | 0.000      | Extracellular matrix organization | Maturation of spike protein            | 0.039 | Disease       |

For each pathway, the FDR (or the p-value in case the FDR significance was not reached) and the root node in which the pathway belongs is shown. LCLs samples of C9orf72 group and sporadic FTD were not available. Filters applied: adjusted-p val <0.05. Abbreviations: CTRL, healthy controls; sEOAD, sporadic early-onset Alzheimer's disease; PSEN1, autosomal dominant Alzheimer's disease caused by mutation in *PSEN1*; MAPT, GRN, C9orf72, familial frontotemporal dementia caused by mutation in *MAPT*, *GRN* or *C9orf72*; sFTD-Tau, sporadic frontotemporal dementia with tau deposits; sFTD-TDP43, sporadic frontotemporal dementia with TDP43 deposits; LCLs, lymphoblastoid cell lines.
