# Supplementary material for: Genome-Wide DNA Methylation in Early-Onset-Dementia Patients Brain Tissue and Lymphoblastoid Cell Lines
Source: MDPI journal article supplement (doi:10.3390/ijms25105445), 2024-05-16
Supplement: s1 [file s1]

**Additional file S10.** Common differentially methylated CpGs (DMPs) found between all patients vs. control comparisons performed.

| Comparisons                                                                                                                       | Common DMPs list (Brain) |
|-----------------------------------------------------------------------------------------------------------------------------------|--------------------------|
| sEOAD vs. CTRL<br>PSEN1 vs. CTRL<br>sFTD-Tau vs. CTRL<br>sFTD-TDP43 vs. CTRL<br>MAPT vs. CTRL<br>GRN vs. CTRL<br>C9orf72 vs. CTRL | cg17925226               |
| sEOAD vs. CTRL<br>PSEN1 vs. CTRL<br>sFTD-TDP43 vs. CTRL<br>MAPT vs. CTRL<br>GRN vs. CTRL<br>C9orf72 vs. CTRL                      | cg06354054               |
| PSEN1 vs. CTRL<br>sFTD-Tau vs. CTRL<br>sFTD-TDP43 vs. CTRL<br>MAPT vs. CTRL<br>GRN vs. CTRL<br>C9orf72 vs. CTRL                   | cg07902519               |
| sEOAD vs. CTRL<br>PSEN1 vs. CTRL<br>sFTD-TDP43 vs. CTRL<br>MAPT vs. CTRL<br>GRN vs. CTRL                                          | cg02945674               |
| sEOAD vs. CTRL<br>PSEN1 vs. CTRL<br>sFTD-TDP43 vs. CTRL<br>MAPT vs. CTRL<br>C9orf72 vs. CTRL                                      | cg14866535               |

|                                                                                                |                        |
|------------------------------------------------------------------------------------------------|------------------------|
| sEOAD vs. CTRL<br>PSEN1 vs. CTRL<br>sFTD-TDP43 vs. CTRL<br>GRN vs. CTRL<br>C9orf72 vs. CTRL    | cg05232042             |
| PSEN1 vs. CTRL<br>sFTD-Tau vs. CTRL<br>sFTD-TDP43 vs. CTRL<br>GRN vs. CTRL<br>C9orf72 vs. CTRL | cg10737404             |
| sEOAD vs. CTRL<br>PSEN1 vs. CTRL<br>sFTD-TDP43 vs. CTRL<br>C9orf72 vs. CTRL                    | cg05966078             |
| sEOAD vs. CTRL<br>sFTD-Tau vs. CTRL<br>sFTD-TDP43 vs. CTRL<br>GRN vs. CTRL                     | cg22481673; cg00892228 |
| sEOAD vs. CTRL<br>sFTD-TDP43 vs. CTRL<br>MAPT vs. CTRL<br>C9orf72 vs. CTRL                     | cg22955899             |
| sEOAD vs. CTRL<br>sFTD-TDP43 vs. CTRL<br>GRN vs. CTRL<br>C9orf72 vs. CTRL                      | cg07319199             |
| sEOAD vs. CTRL<br>MAPT vs. CTRL<br>GRN vs. CTRL<br>C9orf72 vs. CTRL                            | cg15292356; cg13521643 |
| PSEN1 vs. CTRL<br>sFTD-Tau vs. CTRL<br>sFTD-TDP43 vs. CTRL<br>GRN vs. CTRL                     | cg11969330; cg05834845 |

|                                                                            |                        |
|----------------------------------------------------------------------------|------------------------|
| PSEN1 vs. CTRL<br>sFTD-Tau vs. CTRL<br>MAPT vs. CTRL<br>C9orf72 vs. CTRL   | cg09061753             |
| PSEN1 vs. CTRL<br>sFTD-Tau vs. CTRL<br>GRN vs. CTRL<br>C9orf72 vs. CTRL    | cg11054397             |
| PSEN1 vs. CTRL<br>sFTD-TDP43 vs. CTRL<br>MAPT vs. CTRL<br>C9orf72 vs. CTRL | cg00899976             |
| PSEN1 vs. CTRL<br>sFTD-TDP43 vs. CTRL<br>GRN vs. CTRL<br>C9orf72 vs. CTRL  | cg07472332             |
| PSEN1 vs. CTRL<br>MAPT vs. CTRL<br>GRN vs. CTRL<br>C9orf72 vs. CTRL        | cg15950547             |
| sEOAD vs. CTRL<br>PSEN1 vs. CTRL<br>sFTD-Tau vs. CTRL                      | cg08522473             |
| sEOAD vs. CTRL<br>PSEN1 vs. CTRL<br>C9orf72 vs. CTRL                       | cg01059116             |
| sEOAD vs. CTRL<br>sFTD-Tau vs. CTRL<br>sFTD-TDP43 vs. CTRL                 | cg24996718; cg04034998 |
| sEOAD vs. CTRL<br>sFTD-TDP43 vs. CTRL<br>MAPT vs. CTRL                     | cg26983017             |

|                                                           |                                    |
|-----------------------------------------------------------|------------------------------------|
| sEOAD vs. CTRL<br>sFTD-TDP43 vs. CTRL<br>GRN vs. CTRL     | cg20017683                         |
| sEOAD vs. CTRL<br>sFTD-TDP43 vs. CTRL<br>C9orf72 vs. CTRL | cg08269402                         |
| sEOAD vs. CTRL<br>GRN vs. CTRL<br>C9orf72 vs. CTRL        | cg07568443                         |
| PSEN1 vs. CTRL<br>sFTD-Tau vs. CTRL<br>MAPT vs. CTRL      | cg00403716; cg22244330; cg20565764 |
| PSEN1 vs. CTRL<br>sFTD-Tau vs. CTRL<br>GRN vs. CTRL       | cg06508795                         |
| PSEN1 vs. CTRL<br>sFTD-Tau vs. CTRL<br>C9orf72 vs. CTRL   | cg19389973                         |
| PSEN1 vs. CTRL<br>sFTD-TDP43 vs. CTRL<br>GRN vs. CTRL     | cg21102584                         |
| PSEN1 vs. CTRL<br>MAPT vs. CTRL<br>GRN vs. CTRL           | cg20012315; cg15421137; cg17370981 |
| PSEN1 vs. CTRL<br>GRN vs. CTRL<br>C9orf72 vs. CTRL        | cg12622172; cg13337899; cg00713204 |
| sEOAD vs. CTRL<br>PSEN1 vs. CTRL                          | cg14827740                         |
| sEOAD vs. CTRL<br>sFTD-Tau vs. CTRL                       | cg04892437 cg16816400              |

|                                       |                                                                                                |
|---------------------------------------|------------------------------------------------------------------------------------------------|
| sEOAD vs. CTRL<br>sFTD-TDP43 vs. CTRL | cg23957735; cg08283200; cg14114910; cg18561199; cg08600378; cg05338009                         |
| sEOAD vs. CTRL<br>MAPT vs. CTRL       | cg11986743; cg11973981                                                                         |
| sEOAD vs. CTRL<br>GRN vs. CTRL        | cg00125893; cg09829645                                                                         |
| sEOAD vs. CTRL<br>C9orf72 vs. CTRL    | cg11008123; cg20215438; cg10759817; cg00012123                                                 |
| PSEN1 vs. CTRL<br>sFTD-Tau vs. CTRL   | cg01483656; cg17056069; cg19882830; cg09352518; cg23350716; cg01326874; cg05867245; cg23333490 |
| PSEN1 vs. CTRL<br>sFTD-TDP43 vs. CTRL | cg15399577; cg13989295; cg02246922; cg01081438                                                 |
| PSEN1 vs. CTRL<br>MAPT vs. CTRL       | cg20406175; cg10361788; cg00866176                                                             |
| PSEN1 vs. CTRL<br>GRN vs. CTRL        | cg10834425; cg22024931; cg10773971; cg11823448                                                 |
| PSEN1 vs. CTRL<br>C9orf72 vs. CTRL    | cg01462799; cg04026937                                                                         |

| Comparisons                                      | Common DMPs list (LCLs)                                                            |
|--------------------------------------------------|------------------------------------------------------------------------------------|
| sEOAD vs. CTRL<br>PSEN1 vs. CTRL<br>GRN vs. CTRL | cg25004725                                                                         |
| sEOAD vs. CTRL<br>MAPT vs. CTRL                  | cg15897921; cg25641126; cg08709228; cg15768146; cg07078430; cg02691373             |
| sEOAD vs. CTRL<br>GRN vs. CTRL                   | cg04705480                                                                         |
| PSEN1 vs. CTRL<br>MAPT vs. CTRL                  | cg18197594; cg05082563; cg24923430; cg11954332; cg02505002; cg11078654; cg10501835 |
| PSEN1 vs. CTRL<br>GRN vs. CTRL                   | cg04797323; cg03013609; cg20868217; cg14252149; cg14323910                         |

Filters applied: in brain adjusted-p value <0.05 and absolute value of Beta difference >0.25; in LCLs adjusted-p value <0.01 and absolute value of Beta difference >0.35. Abbreviations: CTRL, healthy controls; sEOAD, sporadic early-onset Alzheimer's disease; PSEN1, autosomal dominant Alzheimer's disease caused by mutation in *PSEN1* gene; MAPT, GRN, C9orf72, familial frontotemporal dementia caused by mutation in *MAPT*, *GRN* or *C9orf72* genes; sFTD-Tau, sporadic frontotemporal dementia with tau deposits; sFTD-TDP43, sporadic frontotemporal dementia with TDP43 deposits; LCLs, lymphoblastoid cell lines.
