# Supplementary material for: Genome-Wide DNA Methylation in Early-Onset-Dementia Patients Brain Tissue and Lymphoblastoid Cell Lines
Source: MDPI journal article supplement (doi:10.3390/ijms25105445), 2024-05-16
Supplement: s1 [file s1]

**Additional file S3.** Number of differentially methylated CpGs (DMPs) found in each comparison and region.

| BRAIN                   |        |            |           |            |            |           |         |            |           |         |            |           |         |            |           |         |            |           |
|-------------------------|--------|------------|-----------|------------|------------|-----------|---------|------------|-----------|---------|------------|-----------|---------|------------|-----------|---------|------------|-----------|
| Comparison              | Total  | HYPER met. | HYPO met. | CpG Island | HYPER met. | HYPO met. | N_Shore | HYPER met. | HYPO met. | S_Shore | HYPER met. | HYPO met. | N_Shelf | HYPER met. | HYPO met. | S_Shelf | HYPER met. | HYPO met. |
| sEOAD vs. CTRL          | 29133  | 25026      | 4107      | 5185       | 3025       | 2160      | 2877    | 2557       | 320       | 2383    | 2083       | 300       | 1189    | 1106       | 83        | 1167    | 1100       | 67        |
| PSEN1 vs. CTRL          | 22857  | 19200      | 3657      | 4306       | 3205       | 1101      | 2381    | 2008       | 373       | 2159    | 1790       | 369       | 900     | 751        | 149       | 752     | 629        | 123       |
| PSEN1 vs. sEOAD         | 102488 | 71272      | 31216     | 21990      | 14596      | 7394      | 9573    | 6674       | 2895      | 8099    | 5699       | 2396      | 3502    | 2500       | 1002      | 3382    | 2380       | 1000      |
| sFTD-Tau vs. CTRL       | 156601 | 143485     | 13116     | 18871      | 13204      | 5667      | 12667   | 11470      | 1197      | 10683   | 9617       | 1066      | 6048    | 5692       | 356       | 5700    | 5398       | 302       |
| sFTD-TDP43 vs. CTRL     | 316263 | 288975     | 27288     | 40090      | 29833      | 10257     | 28894   | 26629      | 2265      | 24354   | 22429      | 1925      | 12454   | 11628      | 826       | 11585   | 10856      | 729       |
| sFTD-TDP43 vs. sFTD-Tau | 14146  | 11837      | 2309      | 2892       | 2088       | 804       | 1295    | 989        | 306       | 1106    | 874        | 232       | 546     | 492        | 54        | 527     | 460        | 67        |
| MAPT vs. CTRL           | 78204  | 71196      | 7008      | 16698      | 12116      | 4582      | 8925    | 8472       | 453       | 7612    | 7243       | 369       | 3489    | 3380       | 109       | 3297    | 3203       | 94        |
| GRN vs. CTRL            | 173621 | 163815     | 9806      | 29787      | 23409      | 6378      | 15060   | 14270      | 790       | 12589   | 11983      | 606       | 6985    | 6801       | 184       | 6528    | 6385       | 143       |
| C9orf72 vs. CTRL        | 80779  | 73706      | 7073      | 16913      | 13043      | 3870      | 8198    | 7527       | 671       | 6815    | 6247       | 568       | 3092    | 2927       | 165       | 2878    | 2753       | 125       |
| LCLs                    |        |            |           |            |            |           |         |            |           |         |            |           |         |            |           |         |            |           |
| sEOAD vs. CTRL          | 43722  | 29038      | 14684     | 7723       | 3576       | 4147      | 5148    | 3076       | 2072      | 4294    | 2669       | 1625      | 1608    | 1231       | 377       | 1520    | 1151       | 369       |
| PSEN1 vs. CTRL          | 42020  | 29146      | 12874     | 10195      | 2613       | 7582      | 3761    | 2477       | 1284      | 3176    | 2106       | 1070      | 1634    | 1485       | 149       | 1520    | 1378       | 142       |
| MAPT vs. CTRL           | 121097 | 99020      | 22077     | 24448      | 16248      | 8200      | 12448   | 9791       | 2657      | 10661   | 8488       | 2173      | 4112    | 3540       | 572       | 3911    | 3359       | 552       |
| GRN vs. CTRL            | 64514  | 31182      | 33332     | 23611      | 3014       | 20597     | 6339    | 3005       | 3334      | 5310    | 2563       | 2747      | 2045    | 1658       | 387       | 1867    | 1519       | 348       |
| PSEN1 vs. sEOAD         | 33880  | 14606      | 19274     | 6348       | 2820       | 3528      | 3896    | 1822       | 2074      | 3352    | 1604       | 1748      | 1239    | 544        | 695       | 1082    | 446        | 636       |
| GRN vs. MAPT            | 46790  | 11667      | 35123     | 15838      | 1892       | 13956     | 5988    | 1261       | 4727      | 5164    | 1174       | 3990      | 1294    | 545        | 749       | 1162    | 540        | 622       |

According to the relative position to the nearest CpG island, two different regions exist: Shores (2Kb from islands) and shelves (4Kb from islands). At the same time, each region may be closer to the 5' end (N region) or to the 3' end (S region). In comparisons between patients and controls, hyper or hypomethylation refers to the patients' group. Between two groups of patients, it refers to the second group of the comparison. Filters applied: adjusted-p value <0.05. Abbreviations: CTRL, healthy controls; sEOD, sporadic early-onset Alzheimer's disease; PSEN1, autosomal dominant Alzheimer's disease caused by mutation in *PSEN1*; MAPT, GRN, C9orf72, familial frontotemporal dementia caused by mutation in *MAPT*, *GRN* or *C9orf72*; sFTD-Tau, sporadic frontotemporal dementia with tau deposits; sFTD-TDP43, sporadic frontotemporal dementia with TDP43 deposits; LCLs, lymphoblastoid cell lines.
