# Supplementary material for: Genome-Wide DNA Methylation in Early-Onset-Dementia Patients Brain Tissue and Lymphoblastoid Cell Lines
Source: MDPI journal article supplement (doi:10.3390/ijms25105445), 2024-05-16
Supplement: s1 [file s1]

**Additional file S5.** Top 10 differentially methylated CpGs with the highest methylation Beta difference in each comparison performed.

| sEOAD vs. CTRL  |                  |                 |          |            |                             |                 |          |
|-----------------|------------------|-----------------|----------|------------|-----------------------------|-----------------|----------|
| BRAIN           |                  |                 |          | LCLs       |                             |                 |          |
| CpG             | Gene             | Beta difference | Adj.pval | CpG        | Gene                        | Beta difference | Adj.pval |
| cg00892228      | <i>TAS1R2</i>    | 0.4916          | 0.0008   | cg02333792 | <i>RASGRF1</i>              | 0.5822          | 0.0002   |
| cg14114910      | <i>MORN5</i>     | 0.4771          | 0.0000   | cg01165781 | <i>SYTL1</i>                | -0.4866         | 0.0029   |
| cg11973981      | <i>ISPD</i>      | 0.4759          | 0.0450   | cg19317532 | <i>LRRC1</i>                | -0.4764         | 0.0000   |
| cg00348031      | <i>NFATC1</i>    | -0.4712         | 0.0120   | cg26397736 | <i>IL4I1; NUP62</i>         | -0.4715         | 0.0001   |
| cg12169700      | <i>MAD1L1</i>    | -0.4670         | 0.0205   | cg15967058 | <i>AKR1B1</i>               | -0.4660         | 0.0001   |
| cg16178271      | <i>MAD1L1</i>    | -0.4469         | 0.0184   | cg10193422 | <i>MAX</i>                  | 0.4647          | 0.0000   |
| cg17181941      | <i>NCAPH</i>     | -0.4435         | 0.0011   | cg16797831 | <i>KIAA1324; C1orf194</i>   | 0.4640          | 0.0000   |
| cg22481673      | <i>RD3</i>       | 0.4384          | 0.0011   | cg11120684 | <i>BACH2</i>                | -0.4424         | 0.0000   |
| cg14866535      | <i>FAM65C</i>    | 0.4218          | 0.0021   | cg25004725 | <i>ANXA6</i>                | 0.4396          | 0.0007   |
| cg11008123      | <i>LOC283267</i> | 0.4121          | 0.0032   | cg24937675 | <i>SGK1</i>                 | -0.4376         | 0.0051   |
| PSEN1 vs. CTRL  |                  |                 |          |            |                             |                 |          |
| BRAIN           |                  |                 |          | LCLs       |                             |                 |          |
| CpG             | Gene             | Beta difference | Adj.pval | CpG        | Gene                        | Beta difference | Adj.pval |
| cg05611160      | <i>LPPR1</i>     | -0.5632         | 0.0090   | cg03013609 | <i>LGALS8</i>               | -0.5929         | 0.0017   |
| cg14417873      | <i>VAV2</i>      | -0.5237         | 0.0051   | cg14252149 | <i>LGALS8</i>               | -0.5806         | 0.0022   |
| cg06508795      | <i>DDC</i>       | 0.4949          | 0.0133   | cg09993319 | <i>MGMT</i>                 | 0.5719          | 0.0033   |
| cg01462799      | <i>UPF1</i>      | 0.4874          | 0.0004   | cg26839010 | <i>C1orf87</i>              | 0.5367          | 0.0000   |
| cg04026937      | <i>HLA-DRB1</i>  | 0.4807          | 0.0004   | cg03544800 | <i>DNTTIP2</i>              | -0.5202         | 0.0025   |
| cg17858192      | <i>PROM1</i>     | 0.4648          | 0.0055   | cg00350405 | <i>IWS1</i>                 | 0.4960          | 0.0003   |
| cg01326874      | <i>ZNF714</i>    | -0.4542         | 0.0021   | cg09114339 | <i>PTPN1</i>                | 0.4603          | 0.0005   |
| cg03013609      | <i>LGALS8</i>    | -0.4392         | 0.0020   | cg17572255 | <i>LIMA1</i>                | -0.4466         | 0.0009   |
| cg06174194      | <i>PIK3CG</i>    | 0.4247          | 0.0008   | cg04797323 | <i>SOCS2</i>                | -0.4411         | 0.0013   |
| cg17487799      | <i>CYP7B1</i>    | -0.4233         | 0.0027   | cg09829645 | <i>DYSF</i>                 | 0.4343          | 0.0056   |
| PSEN1 vs. sEOAD |                  |                 |          |            |                             |                 |          |
| BRAIN           |                  |                 |          | LCLs       |                             |                 |          |
| CpG             | Gene             | Beta difference | Adj.pval | CpG        | Gene                        | Beta difference | Adj.pval |
| cg14417873      | <i>VAV2</i>      | -0.5307         | 0.0017   | cg11579905 | <i>LRR1Q3; TNNI3K; FPGT</i> | 0.5778          | 0.0000   |

|            |                |         |        |            |                 |         |        |
|------------|----------------|---------|--------|------------|-----------------|---------|--------|
| cg00348031 | <i>NFATC1</i>  | 0.5015  | 0.0401 | cg27515399 | <i>HERPUD1</i>  | 0.5288  | 0.0000 |
| cg08238516 | <i>NSF</i>     | 0.4564  | 0.0000 | cg16885861 | <i>CD81</i>     | 0.5043  | 0.0027 |
| cg06961873 | <i>TMEM57</i>  | 0.4534  | 0.0000 | cg04588766 | <i>SMARCC1</i>  | 0.4997  | 0.0001 |
| cg01326874 | <i>ZNF714</i>  | -0.4494 | 0.0000 | cg26851891 | <i>MEF2C</i>    | 0.4932  | 0.0000 |
| cg18443741 | <i>PYROXD1</i> | 0.4454  | 0.0061 | cg13505479 | <i>FAM60A</i>   | 0.4891  | 0.0034 |
| cg17351927 | <i>NOTCH4</i>  | 0.4337  | 0.0013 | cg23599843 | <i>JPH1</i>     | -0.4842 | 0.0000 |
| cg05867245 | <i>ZBTB46</i>  | 0.4067  | 0.0249 | cg14789659 | <i>ARID5B</i>   | 0.4815  | 0.0001 |
| cg21829038 | <i>LRRK1</i>   | 0.4027  | 0.0000 | cg09209679 | <i>FAM19A5</i>  | 0.4791  | 0.0025 |
| cg09352518 | <i>ZNF714</i>  | -0.3987 | 0.0000 | cg08095377 | <i>C2orf27A</i> | 0.4747  | 0.0000 |

| sFTD-Tau vs. CTRL (Brain) |               |                 |          | sFTD-TDP43 vs. CTRL (Brain) |                           |                 |          |
|---------------------------|---------------|-----------------|----------|-----------------------------|---------------------------|-----------------|----------|
| CpG                       | Gene          | Beta difference | Adj.pval | CpG                         | Gene                      | Beta difference | Adj.pval |
| cg15184869                | <i>PEBP4</i>  | -0.6193         | 0.0001   | cg13569207                  | <i>ZNF862</i>             | 0.6267          | 0.0005   |
| cg07505631                | <i>CDCP1</i>  | 0.5261          | 0.0028   | cg13913990                  | <i>PLEKHG4B</i>           | -0.5341         | 0.0034   |
| cg06508795                | <i>DDC</i>    | 0.4930          | 0.0228   | cg25285484                  | <i>ZNF597; NAA60</i>      | 0.4985          | 0.0012   |
| cg05138546                | <i>KRT36</i>  | -0.4604         | 0.0136   | cg08024264                  | <i>SCARNA16; C17orf86</i> | 0.4966          | 0.0002   |
| cg10240906                | <i>BMP7</i>   | 0.4588          | 0.0413   | cg17925226                  | <i>BMPR1B</i>             | 0.4702          | 0.0000   |
| cg11229715                | <i>CUL3</i>   | 0.4417          | 0.0126   | cg18391209                  | <i>CAPN8</i>              | 0.4635          | 0.0000   |
| cg00729708                | <i>LASS3</i>  | 0.4374          | 0.0000   | cg00729708                  | <i>LASS3</i>              | 0.4625          | 0.0000   |
| cg17056069                | <i>ASAP2</i>  | -0.4348         | 0.0135   | cg14651435                  | <i>DNAJB6</i>             | 0.4387          | 0.0207   |
| cg11969330                | <i>CYP4V2</i> | 0.4223          | 0.0000   | cg12657416                  | <i>FAM69B</i>             | 0.4256          | 0.0003   |
| cg06091288                | <i>SORBS1</i> | 0.4180          | 0.0003   | cg05305893                  | <i>FGF11; CHRNA1</i>      | 0.4243          | 0.0000   |

| sFTD-TDP43 vs. sFTD-Tau (Brain) |                      |                 |          |
|---------------------------------|----------------------|-----------------|----------|
| CpG                             | Gene                 | Beta difference | Adj.pval |
| cg10890644                      | <i>TUBAL3</i>        | 0.6517          | 0.0000   |
| cg26983017                      | <i>HCK</i>           | 0.5955          | 0.0151   |
| cg20381372                      | <i>LOC100134317</i>  | 0.5890          | 0.0000   |
| cg09650803                      | <i>IL4R</i>          | -0.5454         | 0.0002   |
| cg18932722                      | <i>TMCC3</i>         | -0.5441         | 0.0116   |
| cg10006614                      | <i>C14orf139</i>     | 0.5313          | 0.0037   |
| cg25285484                      | <i>ZNF597; NAA60</i> | 0.4630          | 0.0404   |
| cg08283200                      | <i>SOX5</i>          | -0.4605         | 0.0000   |
| cg01553548                      | <i>FRAS1</i>         | 0.4399          | 0.0203   |
| cg27049594                      | <i>OR8A1</i>         | 0.4330          | 0.0132   |

| MAPT vs. CTRL            |           |                 |          |            |                 |                 |          |
|--------------------------|-----------|-----------------|----------|------------|-----------------|-----------------|----------|
| BRAIN                    |           |                 |          | LCLs       |                 |                 |          |
| CpG                      | Gene      | Beta difference | Adj.pval | CpG        | Gene            | Beta difference | Adj.pval |
| cg06409673               | FAM19A5   | -0.5927         | 0.0497   | cg20592836 | TP53INP2        | 0.6685          | 0.0010   |
| cg03958058               | PPP2R2D   | 0.5544          | 0.0005   | cg16763089 | LOC149837       | 0.5710          | 0.0018   |
| cg11973981               | ISPD      | 0.5498          | 0.0001   | cg21778743 | FAM228A         | 0.5533          | 0.0000   |
| cg07505631               | CDCP1     | 0.5431          | 0.0015   | cg23713742 | SPAG4           | 0.5497          | 0.0069   |
| cg00588575               | SAPCD2    | 0.5306          | 0.0000   | cg26217827 | ITGA11          | -0.5471         | 0.0000   |
| cg21211688               | ADAMTSL2  | -0.5306         | 0.0409   | cg15768146 | ZFHX2;<br>THTPA | 0.5467          | 0.0001   |
| cg12657416               | FAM69B    | 0.5167          | 0.0011   | cg20295248 | LOC149837       | 0.5423          | 0.0003   |
| cg14866535               | FAM65C    | 0.4837          | 0.0000   | cg11897887 | CST9L           | -0.5357         | 0.0010   |
| cg10482512               | CCR6      | 0.4703          | 0.0012   | cg19656689 | PTPRR           | 0.5256          | 0.0001   |
| cg15950547               | FAM107B   | 0.4573          | 0.0000   | cg19317715 | AOC2            | -0.5177         | 0.0010   |
| GRN vs. CTRL             |           |                 |          |            |                 |                 |          |
| BRAIN                    |           |                 |          | LCLs       |                 |                 |          |
| CpG                      | Gene      | Beta difference | Adj.pval | CpG        | Gene            | Beta difference | Adj.pval |
| cg03958058               | PPP2R2D   | 0.6698          | 0.0000   | cg08919780 | CDK13           | -0.6478         | 0.0000   |
| cg10632770               | KIAA1199  | -0.5623         | 0.0189   | cg00540295 | FAM69B          | 0.5596          | 0.0085   |
| cg04132418               | LOC285733 | 0.5571          | 0.0109   | cg18816397 | HLA-DRB5        | -0.5442         | 0.0000   |
| cg00892228               | TAS1R2    | 0.5513          | 0.0067   | cg14252149 | LGALS8          | -0.5372         | 0.0029   |
| cg12206353               | ARHGEF28  | -0.5258         | 0.0001   | cg03013609 | LGALS8          | -0.5247         | 0.0067   |
| cg14168080               | PTPRN2    | 0.4933          | 0.0000   | cg01002086 | FSTL4           | 0.4995          | 0.0001   |
| cg18624102               | FBXO27    | 0.4927          | 0.0447   | cg25004725 | ANXA6           | 0.4966          | 0.0010   |
| cg04453550               | TNFRSF17  | -0.4832         | 0.0001   | cg11377625 | KCTD1           | -0.4862         | 0.0000   |
| cg06508795               | DDC       | 0.4811          | 0.0186   | cg13616508 | YWHAG           | 0.4721          | 0.0000   |
| cg22984586               | CCR5      | 0.4670          | 0.0047   | cg26651280 | GALNS           | -0.4715         | 0.0082   |
| C9orf72 vs. CTRL (Brain) |           |                 |          |            |                 |                 |          |
| CpG                      | Gene      | Beta difference | Adj.pval |            |                 |                 |          |
| cg13569207               | ZNF862    | 0.6605          | 0.0007   |            |                 |                 |          |
| cg21211688               | ADAMTSL2  | -0.6461         | 0.0000   |            |                 |                 |          |
| cg11008123               | LOC283267 | 0.5847          | 0.0087   |            |                 |                 |          |
| cg04026937               | HLA-DRB1  | 0.5440          | 0.0010   |            |                 |                 |          |
| cg04683516               | AKR1C2    | -0.5356         | 0.0216   |            |                 |                 |          |

|            |                |         |        |
|------------|----------------|---------|--------|
| cg03958058 | <i>PPP2R2D</i> | 0.5128  | 0.0092 |
| cg21388339 | <i>TP73</i>    | -0.4735 | 0.0006 |
| cg14889167 | <i>FSTL4</i>   | 0.4728  | 0.0458 |
| cg20976286 | <i>OCA2</i>    | 0.4508  | 0.0055 |
| cg06174194 | <i>PIK3CG</i>  | 0.4376  | 0.0002 |

Sporadic FTD and *C9orf72* patients had not LCLs samples available. In comparisons between patients and controls, hyper or hypomethylation refers to the patients' group. Between two groups of patients, it refers to the second group of the comparison. Abbreviations: CTRL, healthy controls; sEOAD, sporadic early-onset Alzheimer's disease; PSEN1, autosomal dominant Alzheimer's disease caused by mutation in *PSEN1*; MAPT, GRN, *C9orf72*, familial frontotemporal dementia caused by mutation in *MAPT*, *GRN* or *C9orf72*; sFTD-Tau, sporadic frontotemporal dementia with tau deposits; sFTD-TDP43, sporadic frontotemporal dementia with TDP43 deposits; LCLs, lymphoblastoid cell lines.
