# Supplementary material for: Genome-Wide DNA Methylation in Early-Onset-Dementia Patients Brain Tissue and Lymphoblastoid Cell Lines
Source: Int J Mol Sci. 2024 May 16;25(10):5445. doi: 10.3390/ijms25105445 (PMC11121630; doi:10.3390/ijms25105445)
Supplement: Supplementary file 1 [file ijms-25-05445-s001.zip]

Archive with 11 entries (11 files):
- Supplemental material S1. MutationsList.pdf
- Supplemental material S10. Common CpGs_AD+FTD.pdf
- Supplemental material S11. ElasticNet.pdf
- Supplemental material S2. Pyrosequence primers + validation results.pdf
- Supplemental material S3. Number_CpGs.pdf
- Supplemental material S4. DMPs_Causative genes.pdf
- Supplemental material S5. Top10 DMPs.pdf
- Supplemental material S6. Pathways_GO.pdf
- Supplemental material S7. Pathways_Reactome.pdf
- Supplemental material S8. Heatmaps_FTD.pdf
- Supplemental material S9. Common CpGs_FTD.pdf
